# Supplementary material for: Microencapsulation of Lead-Halide Perovskites in an Oil-in-Fluorine Emulsion for Cell Imaging
Source: MDPI journal article supplement (doi:10.3390/nano13091540), 2023-05-04
Supplement: s1 [file s1]

# Supporting Information

## Microencapsulation of Lead-halide Perovskites in an Oil-in-fluorine Emulsion for Cell Imaging

*Jia-Xin Wang*<sup>1,2,§</sup>, *Chang, Liu*<sup>3,§</sup>, *Hao Huang*<sup>1</sup>, *Rui He*<sup>1,\*</sup>, *Shengyong Geng*<sup>1,\*</sup>, and *Xue-Feng Yu*<sup>1,2,3,\*</sup>

1 Shenzhen Institute of Advanced Technology, Chinese Academy of Sciences, Shenzhen 518055, China

2 University of Chinese Academy of Sciences, Beijing 100049, China

3 Hubei Three Gorges Laboratory, Yichang 443007, China

\* Correspondence: rui.he1@siat.ac.cn (R.H.); sy.geng@siat.ac.cn (S.G.); xf.yu@siat.ac.cn (X.-F.Y.)

† These authors contributed equally to this work.

Keywords: lead-halide perovskites; microencapsulation; oil-in-fluorine emulsion; cell imaging.

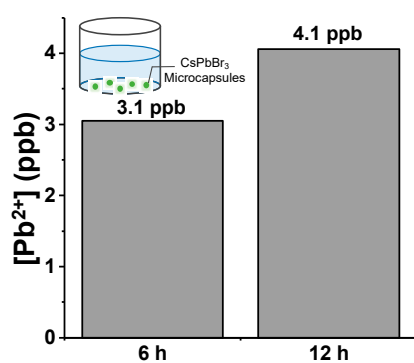

**Figure S1.** The leaked lead concentration after immersing the CsPbBr<sub>3</sub> microcapsules in deionized water for 6 h and 12 h. The inserted schematic illustration for lead leakage test.

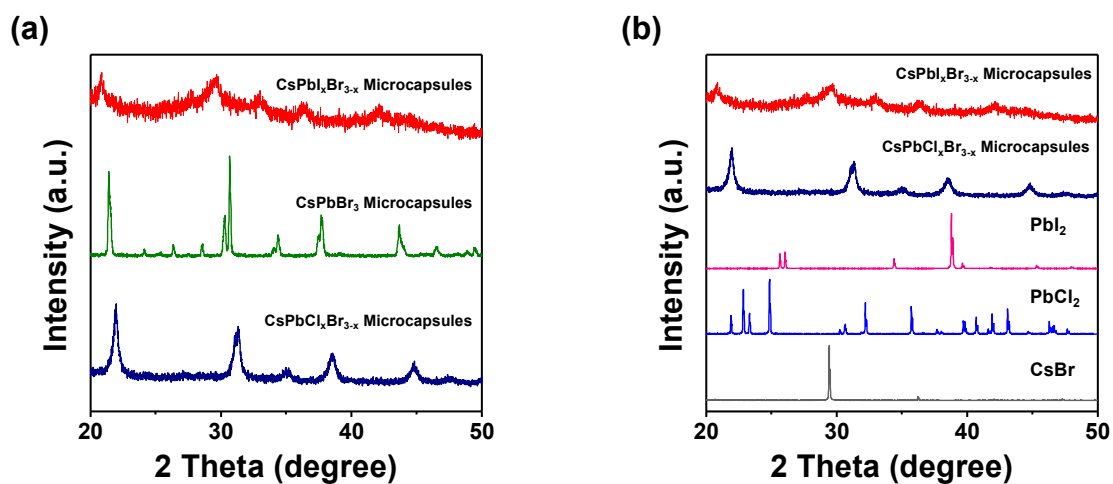

**Figure S2.** (a) XRD pattern for the CsPbI<sub>3</sub>Br<sub>3-x</sub> microcapsules, CsPbBr<sub>3</sub> microcapsules and CsPbCl<sub>3</sub>Br<sub>3-x</sub> microcapsules. As the halide ion was changed from Cl<sup>-</sup> to Br<sup>-</sup> and to I<sup>-</sup>, the 2 theta angle shifts to a small angle direction. (b) XRD pattern for the CsPbI<sub>3</sub>Br<sub>3-x</sub> microcapsules, CsPbCl<sub>3</sub>Br<sub>3-x</sub> microcapsules, PbI<sub>2</sub>, PbCl<sub>2</sub> and CsBr.

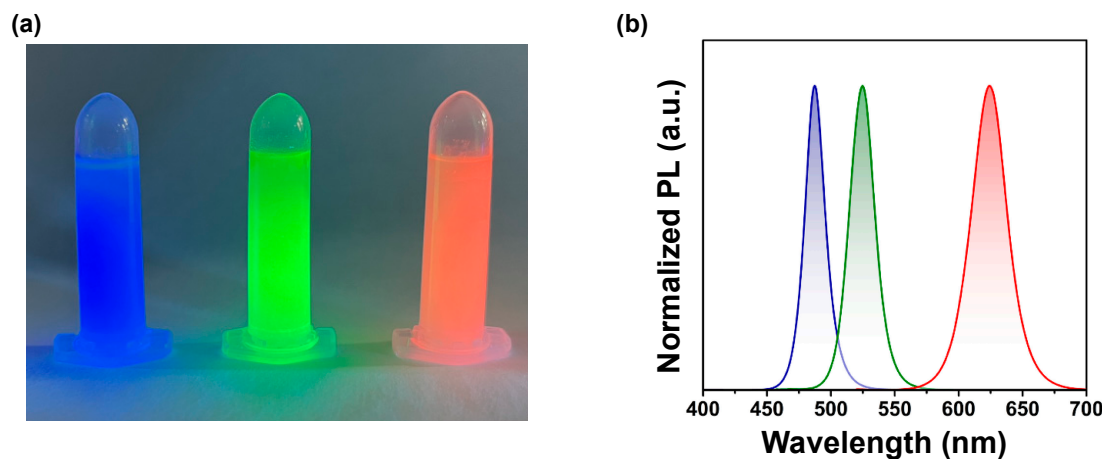

**Figure S3.** (a) Photograph and (b) PL emission spectra of LHP microcapsules with different emission

colors dispersed in PFO.

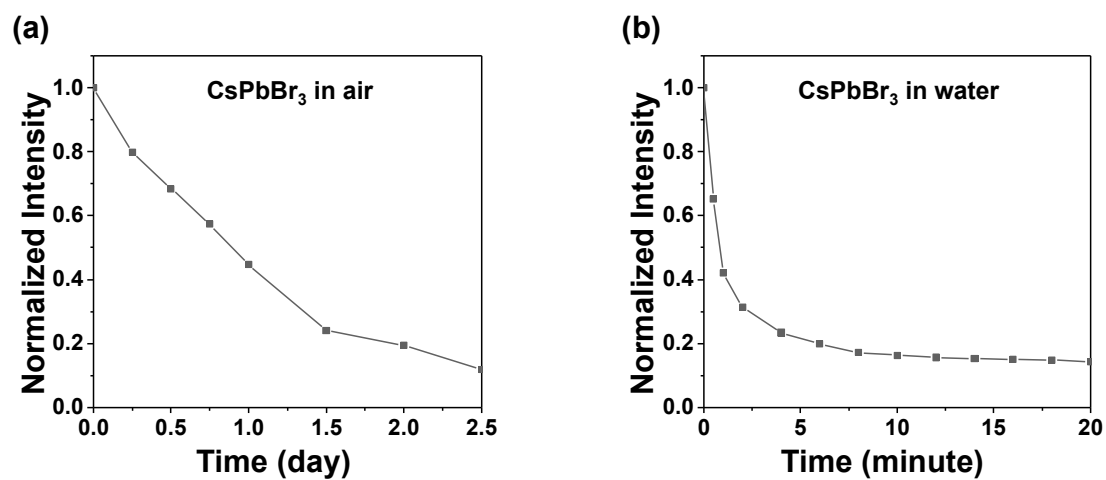

**Figure S4.** The relative fluorescence intensity of CsPbBr<sub>3</sub> as a function of time (a) in air and (b) in water.

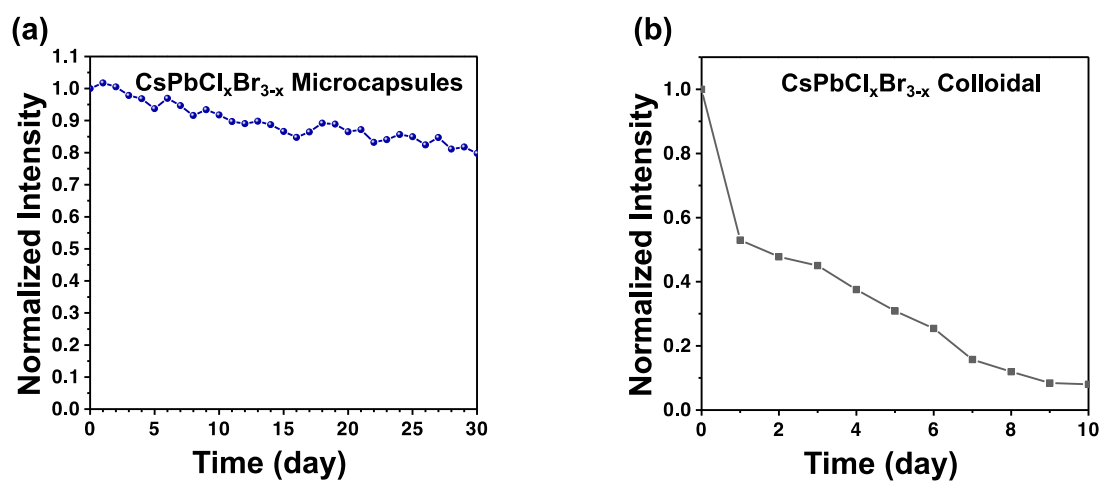

**Figure S5** The relative fluorescence intensity of (a) CsPbCl<sub>x</sub>Br<sub>3-x</sub> microcapsules and (b) colloidal CsPbCl<sub>x</sub>Br<sub>3-x</sub> as a function of air exposure.

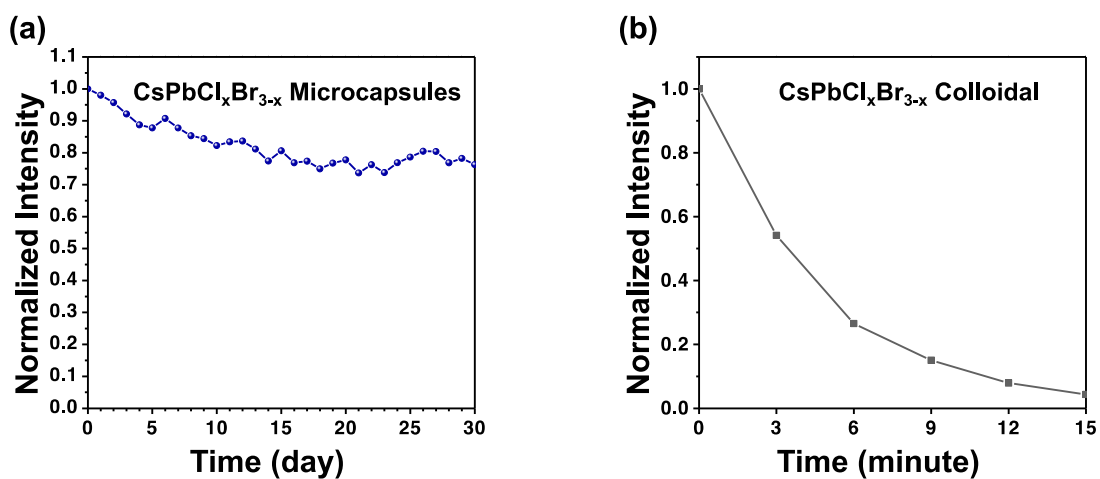

**Figure S6.** The relative fluorescence intensity of (a)  $\text{CsPbCl}_x\text{Br}_{3-x}$  microcapsules and (b) colloidal  $\text{CsPbCl}_x\text{Br}_{3-x}$  as a function of water exposure.

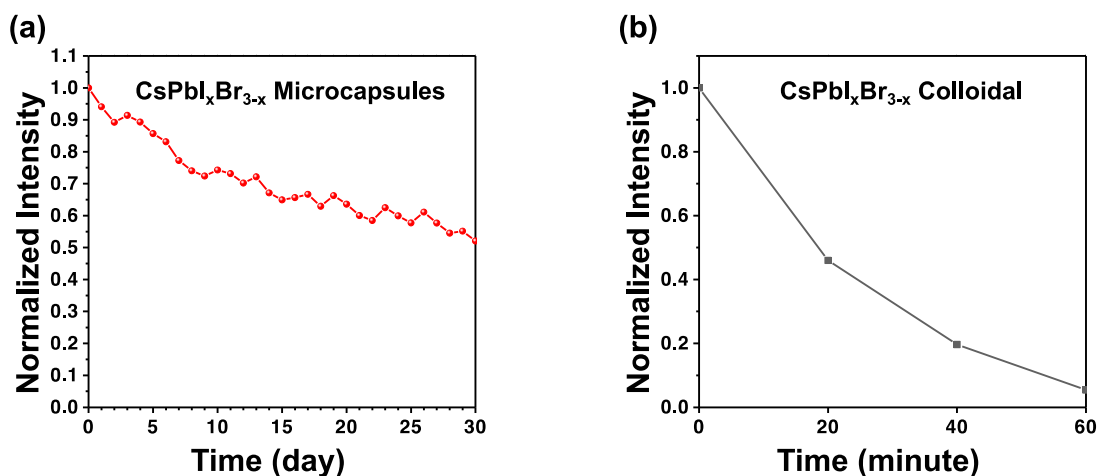

**Figure S7.** The relative fluorescence intensity of (a)  $\text{CsPbI}_x\text{Br}_{3-x}$  microcapsules and (b) colloidal  $\text{CsPbI}_x\text{Br}_{3-x}$  as a function of air exposure.

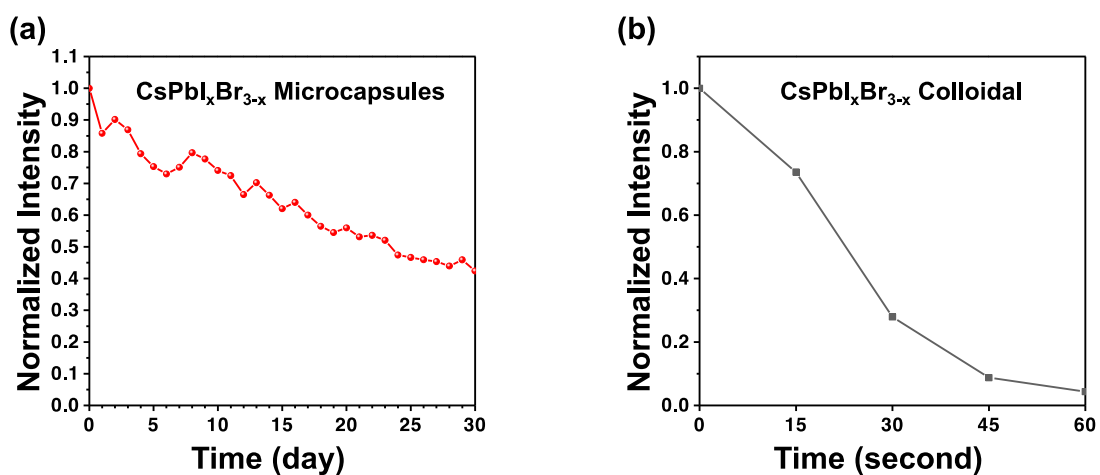

**Figure S8.** The relative fluorescence intensity of (a)  $\text{CsPbI}_x\text{Br}_{3-x}$  microcapsules and (b) colloidal  $\text{CsPbI}_x\text{Br}_{3-x}$  as a function of time in the water.

**Table S1.** Tabulated Fitted Lifetime Components for the  $\text{CsPbBr}_3$  microcapsules and pure  $\text{CsPbBr}_3$  perovskites.

| Materials                          | $\tau_1$           | $\tau_2$            | $\chi^2$ | $\tau_{\text{avg}}$ |
|------------------------------------|--------------------|---------------------|----------|---------------------|
| $\text{CsPbBr}_3$ microcapsules    | 3.83 ns<br>(61.2%) | 19.71 ns<br>(38.7%) | 0.994    | 15.98 ns            |
| pure $\text{CsPbBr}_3$ perovskites | 2.48 ns<br>(75.8%) | 13.66 ns<br>(24.2%) | 0.995    | 9.61 ns             |
